# Supplementary material
Source: PubMed Central journal article supplement (PMC6064976)
Supplement: NIHMS962874-supplement-Supplementary_Tables.pdf [file NIHMS962874-supplement-Supplementary_Tables.pdf]

## Supplementary information

**Table S1**

| Serotype         | N (%)     |
|------------------|-----------|
| DENV1            | 39 (14)   |
| DENV2            | 100 (37)  |
| DENV3            | 72 (26)   |
| DENV4            | 6 (2)     |
| Serotype unknown | 55 (20)   |
| Total            | 272 (100) |

**Table S1. Serotype distribution.** Serotype distribution (by PCR) of detected symptomatic cases.

**Table S2**

| Parameter                                                                                       | Estimate (95% CI)         |
|-------------------------------------------------------------------------------------------------|---------------------------|
| Mean permanent rise in log2-titers ( $\omega_m$ )                                               | 1.33 (1.18-1.48)          |
| Variance permanent rise in log2-titers ( $\omega_v$ )                                           | 1.85 (1.42-2.47)          |
| Mean temporary rise in log2-titers ( $\gamma_m$ )                                               | 5.39 (5.14-5.64)          |
| Variance temporary rise in log2-titers ( $\gamma_v$ )                                           | 4.54 (3.72-5.64)          |
| Mean decay in log2-titers per day ( $\delta_m$ )                                                | 0.017 (0.015-0.019)       |
| Variance decay in log2-titers ( $\delta_v$ )                                                    | 0.00020 (0.00015-0.00028) |
| Difference in rise for infecting vs. non infecting serotype (primary infection only) ( $\eta$ ) | 1.16 (1.15-1.18)          |
| Measurement error ( $\sigma$ - standard deviation of log2-titers)                               | 0.49 (0.49-0.50)          |
| DENV2 bias ( $\chi_2$ ) (log2-titers)                                                           | -0.85 (-0.88 - -0.81)     |
| DENV3 bias ( $\chi_3$ ) (log2-titers)                                                           | -0.19 (-0.22- -0.16)      |
| DENV4 bias ( $\chi_4$ ) (log2-titers)                                                           | 0.06 (0.04-0.09)          |
| Daily force of infection in 1998 per serotype ( $\bar{\lambda}$ )                               | 0.00018 (0.00016-0.00019) |
| 1997 FOI vs 1998 ( $\beta_2$ )                                                                  | 1.11 (0.97-1.27)          |
| 1999 FOI vs 1998 ( $\beta_2$ )                                                                  | 0.88 (0.76-1.00)          |
| 2000 FOI vs 1998 ( $\beta_3$ )                                                                  | 0.29 (0.23-0.35)          |
| 2001 FOI vs 1998 ( $\beta_4$ )                                                                  | 1.01 (0.88-1.17)          |
| 2002 FOI vs 1998 ( $\beta_5$ )                                                                  | 0.43 (0.34-0.53)          |
| Seasonality parameter 1 ( $\delta$ )                                                            | 0.32 (0.24-0.39)          |
| Seasonality parameter 2 ( $\zeta$ )                                                             | 4.0 (3.7-4.2)             |

**Table S2. Parameter estimates from model fit to all study subjects (N=3,451).** Model parameter estimates from model fit to all study subjects (N=3,451)

**Table S3**

|           | <b>Any symptoms</b>     | <b>Hospitalization</b>  | <b>DHF</b>              |
|-----------|-------------------------|-------------------------|-------------------------|
| Intercept | -0.65<br>(-0.95- -0.37) | -2.09<br>(-2.68- -1.63) | -2.66<br>(-3.26- -2.09) |
| 1998      | Ref                     | Ref                     | Ref                     |
| 1999      | 0.02<br>(-0.40-0.42)    | 0.02<br>(-1.08-0.84)    | -0.01<br>(-0.96 – 0.76) |
| 2000      | 0.04<br>(-0.58-0.66)    | 0.03<br>(-1.32-0.88)    | 0.03<br>(-15.71-1.10)   |
| 2001      | 0.04<br>(-0.36-0.36)    | -0.05<br>(-0.73-0.67)   | -0.05<br>(-0.81-0.85)   |
| 2002      | 0.03<br>(-0.53-0.57)    | -0.02<br>(-1.20-0.89)   | -0.04<br>(-1.39-1.04)   |

**Table S3. Log-odds of symptoms, hospitalization and DHF for those infected during the surveillance windows (N=781) as a function of year of infection.** Exponentiated coefficients from logistic regression models with 95% confidence intervals in parentheses.

**Table S4**

|                    | Any symptoms            |                         | Hospitalization         |                          | DHF                     |                           |
|--------------------|-------------------------|-------------------------|-------------------------|--------------------------|-------------------------|---------------------------|
|                    | Simple                  | Multivariable           | Simple                  | Multivariable            | Simple                  | Multivariable             |
| Intercept          | -0.62<br>(-0.80- -0.47) | -0.67<br>(-1.00- -0.31) | -2.59<br>(-2.95- -2.30) | -3.17<br>(-4.11- -2.48)  | -3.11<br>(-3.56- -2.76) | -4.65<br>(-7.21- -3.38)   |
| Age 8-9            | -0.03<br>(-0.36 – 0.31) | -0.02<br>(-0.36- 0.31)  | 0.43<br>(-0.15-1.00)    | 0.48<br>(-0.10-1.08)     | 0.21<br>(-0.58-0.94)    | 0.33<br>(-0.52-1.10)      |
| Age >9             | Ref                     | Ref                     | Ref                     | Ref                      | Ref                     | Ref                       |
| Titer              | -                       | 0.43<br>(-0.70-1.63)    | -                       | 4.03<br>(1.67-7.43)      | -                       | 7.39<br>(3.11-14.99)      |
| Titer <sup>2</sup> | -                       | -0.69<br>(-2.30- 0.73)  | -                       | -7.22<br>(-13.40- -2.56) | -                       | -10.53<br>(-19.11- -3.81) |

**Table S4. Regression for log-odds of symptoms, hospitalization and DHF as a function of with age and titer.** Exponentiated coefficients from logistic regression models with 95% confidence intervals in parentheses.

**Table S5**

| Parameter                                                                                       | True value | Estimated (95% confidence intervals) |
|-------------------------------------------------------------------------------------------------|------------|--------------------------------------|
| Mean permanent rise in titers ( $\omega_m$ )                                                    | 1.4        | 1.3 (1.1-1.5)                        |
| Variance permanent rise in titers ( $\omega_v$ )                                                | 2.0        | 1.5 (1.0-2.3)                        |
| Mean temporary rise in titers ( $\gamma_m$ )                                                    | 5.5        | 5.2 (5.0-5.5)                        |
| Variance temporary rise in titers ( $\gamma_v$ )                                                | 2.0        | 1.4 (1.0-2.0)                        |
| Mean decay in titers ( $\delta_m$ )                                                             | 0.02       | 0.02 (0.02-0.03)                     |
| Variance decay in titers ( $\delta_v$ )                                                         | 0.0002     | 0.0005 (0.0002-0.0009)               |
| Difference in rise for infecting vs. non infecting serotype (primary infection only) ( $\eta$ ) | 1.20       | 1.18 (1.16-1.20)                     |
| Measurement error                                                                               | 0.50       | 0.49 (0.49-0.50)                     |
| DENV2 bias ( $\chi_2$ )                                                                         | -0.8       | -0.8 (-0.7- -0.9)                    |
| DENV3 bias ( $\chi_3$ )                                                                         | -0.2       | -0.2 (-0.1-0.3)                      |
| DENV4 bias ( $\chi_4$ )                                                                         | 0.05       | 0.04 (-0.02-0.11)                    |
| Daily force of infection in 1998 ( $\bar{\lambda}$ )                                            | 0.0009     | 0.0011 (0.0009-0.0014)               |
| Year 2 FOI vs Y1 ( $\beta_2$ )                                                                  | 1.0        | 0.9 (0.7-1.1)                        |
| Year 3 FOI vs Y1 ( $\beta_3$ )                                                                  | 0.2        | 0.2 (0.1-0.2)                        |
| Year 4 FOI vs Y1 ( $\beta_4$ )                                                                  | 1.0        | 1.0 (0.8-1.3)                        |
| Year 5 FOI vs Y1 ( $\beta_5$ )                                                                  | 0.4        | 0.2 (0.1-0.5)                        |
| Seasonality parameter 1 ( $\delta$ )                                                            | 0.4        | 0.4 (0.3-0.5)                        |
| Seasonality parameter 2 ( $\zeta$ )                                                             | 4.0        | 3.8 (3.5-4.1)                        |
| Number of subclinical infections                                                                | 370        | 360 (350-370)                        |

**Table S5. Simulated results.** Results from simulated epidemics from 1000 randomly selected individuals from the cohort.

**Table S6**

| Parameter                                                                                       | True value                                 | Estimated (95% confidence intervals) |
|-------------------------------------------------------------------------------------------------|--------------------------------------------|--------------------------------------|
| Mean permanent rise in titers ( $\omega_m$ )                                                    | 1.4                                        | 1.4 (1.2-1.6)                        |
| Variance permanent rise in titers ( $\omega_v$ )                                                | 2.0                                        | 1.3 (0.9-2.0)                        |
| Mean temporary rise in titers ( $\gamma_m$ )                                                    | 5.5 for symptomatic<br>4.5 for subclinical | 5.2 (4.9-5.5)                        |
| Variance temporary rise in titers ( $\gamma_v$ )                                                | 2.0                                        | 2.0 (1.4-2.8)                        |
| Mean decay in titers ( $\delta_m$ )                                                             | 0.02                                       | 0.024 (0.019-0.032)                  |
| Variance decay in titers ( $\delta_v$ )                                                         | 0.0002                                     | 0.0005 (0.0002-0.0011)               |
| Difference in rise for infecting vs. non infecting serotype (primary infection only) ( $\eta$ ) | 1.20                                       | 1.17 (1.16-1.20)                     |
| Measurement error                                                                               | 0.50                                       | 0.50 (0.49-0.50)                     |
| DENV2 bias ( $\chi_2$ )                                                                         | -0.8                                       | -0.76 (-0.69- -0.83)                 |
| DENV3 bias ( $\chi_3$ )                                                                         | -0.2                                       | -0.22 (-0.015- -0.28)                |
| DENV4 bias ( $\chi_4$ )                                                                         | 0.05                                       | 0.08 (0.01 – 0.15)                   |
| Daily force of infection in 1998 ( $\bar{\lambda}$ )                                            | 0.0009                                     | 0.001 (0.0009-0.0013)                |
| Year 2 FOI vs Y1 ( $\beta_2$ )                                                                  | 1.0                                        | 0.9 (0.8-1.2)                        |
| Year 3 FOI vs Y1 ( $\beta_3$ )                                                                  | 0.2                                        | 0.2 (0.1-0.3)                        |
| Year 4 FOI vs Y1 ( $\beta_4$ )                                                                  | 1.0                                        | 1.2 (0.9-1.6)                        |
| Year 5 FOI vs Y1 ( $\beta_5$ )                                                                  | 0.4                                        | (0.4 (0.2-0.7)                       |
| Seasonality parameter 1 ( $\delta$ )                                                            | 0.4                                        | 0.4 (0.2-0.5)                        |
| Seasonality parameter 2 ( $\zeta$ )                                                             | 4.0                                        | 3.8 (3.4-4.2)                        |
| Number of subclinical infections                                                                | 340                                        | 320 (310-330)                        |

**Table S6. Simulated results in scenario with different rises for symptomatic and non-symptomatic infections.** Results from simulated epidemics from 1000 randomly selected individuals from the cohort where different antibody rises were induced for symptomatic vs non-symptomatic infections.

**Table S7**

| <b>Parameter</b>                                                                                | <b>Base model<br/>(95% CI)</b> | <b>Extra school-specific<br/>parameters (95%CI)</b> |
|-------------------------------------------------------------------------------------------------|--------------------------------|-----------------------------------------------------|
| Mean permanent rise in log2-titers ( $\omega_m$ )                                               | 1.33 (1.18-1.48)               | 1.33 (1.19-1.48)                                    |
| Variance permanent rise in log2-titers ( $\omega_v$ )                                           | 1.85 (1.42-2.47)               | 1.90 (1.46-2.54)                                    |
| Mean temporary rise in log2-titers ( $\gamma_m$ )                                               | 5.39 (5.14-5.64)               | 5.42 (5.19-5.65)                                    |
| Variance temporary rise in log2-titers ( $\gamma_v$ )                                           | 4.54 (3.72-5.64)               | 4.07 (3.35-5.12)                                    |
| Mean decay in log2-titers per day ( $\delta_m$ )                                                | 0.017 (0.015-0.019)            | 0.016 (0.015-0.018)                                 |
| Variance decay in log2-titers ( $\delta_v$ )                                                    | 0.00020 (0.00015-0.00028)      | 0.00020 (0.00015-0.00028)                           |
| Difference in rise for infecting vs. non infecting serotype (primary infection only) ( $\eta$ ) | 1.16 (1.15-1.18)               | 1.16 (1.15-1.17)                                    |
| Measurement error ( $\sigma$ - standard deviation of log2-titers)                               | 0.49 (0.49-0.50)               | 0.49 (0.49-0.50)                                    |
| DENV2 bias ( $\chi_2$ ) (log2-titers)                                                           | -0.85 (-0.88 - -0.81)          | -0.85 (-0.87 - -0.83)                               |
| DENV3 bias ( $\chi_3$ ) (log2-titers)                                                           | -0.19 (-0.22- -0.16)           | -0.19 (-0.22- -0.18)                                |
| DENV4 bias ( $\chi_4$ ) (log2-titers)                                                           | 0.06 (0.04-0.09)               | 0.06 (0.04-0.07)                                    |
| Seasonality parameter 1 ( $\delta$ )                                                            | 0.32 (0.24-0.39)               | 0.32 (0.25-0.39)                                    |
| Seasonality parameter 2 ( $\zeta$ )                                                             | 4.0 (3.7-4.2)                  | 4.0 (3.8-4.3)                                       |
| Number of augmented infections                                                                  | 1,149 (1,135-1,163)            | 1,151 (1,137-1,165)                                 |

**Table S7. Parameter estimates when incorporating school-specific force of infection parameters across all study subjects (N=3,451).** Parameter estimates when a separate force of parameter estimate was included for each of the 12 schools.

**Table S8**

|             | <b>Seronegative at baseline</b> |                  | <b>Seropositive at baseline</b> |                  |
|-------------|---------------------------------|------------------|---------------------------------|------------------|
|             | Pre vaccination                 | Post vaccination | Pre vaccination                 | Post vaccination |
| DENV1       | 5                               | 26               | 278                             | 912              |
| DENV2       | 5                               | 69               | 306                             | 1050             |
| DENV3       | 5                               | 71               | 261                             | 907              |
| DENV4       | 5                               | 73               | 73                              | 353              |
| <b>Mean</b> | <b>5</b>                        | <b>60</b>        | <b>228</b>                      | <b>806</b>       |

**Table S8. Results extracted from Dengvaxia vaccine study.** PRNT titers pre and post vaccination from participants in the Dengvaxia phase III trial as extracted from Table S8 in Villar et al., (2015).
